# Supplementary material
Source: PubMed Central journal article supplement (PMC5330742)
Supplement: jci-127-89927-s001.pdf [file jci-127-89927-s001.pdf]

Supplemental Table 1: Reagents used in this study.

| Antibody                            | Clone           | Application            | Source                                  | Catalog #   |
|-------------------------------------|-----------------|------------------------|-----------------------------------------|-------------|
| rabbit anti-OVA                     | polyclonal      | IB, IP, IF, ELISA      | MP Biochemical                          | 0855304     |
| mouse anti-OVA IgG1                 | OVA-14          | IF, ELISA              | Sigma                                   | A6075       |
| HRP-conjugated goat anti-rabbit IgG | polyclonal      | IP                     | Southern Biotechnology                  | 4049-05     |
| rabbit anti-mouse/human LDH3        | polyclonal      | IP, IF, <i>in vivo</i> | gift from Dr. E. Goldberg               | --          |
| rabbit anti-mouse/human Zan D3p18   | polyclonal      | IP, IF, <i>in vivo</i> | gift from Dr. D.M. Hardy                | --          |
| rabbit anti-pig Zan                 | polyclonal      | IP                     | gift from Dr. D.M. Hardy                | --          |
| rat anti-mouse CD25                 | PC61            | <i>in vivo</i>         | Lymphocyte Culture Center at UVA        | --          |
| biotinylated goat anti-rabbit IgG   | polyclonal      | IF                     | Southern Biotechnology                  | 4050-08     |
| rat anti-mouse F4/80 IgG            | C1:A3-1         | IF, FC                 | Cedarlane                               | CL8940      |
| biotinylated rabbit anti-rat IgG    | polyclonal      | IF                     | Vector Laboratories                     | BA-4001     |
| biotinylated mouse anti-rat IgG     | polyclonal      | IF                     | Jackson Immunoresearch Laboratories     | 212-066-102 |
| goat anti-rabbit IgG-FITC           | polyclonal      | IF                     | Southern Biotechnology                  | 4050-02     |
| goat anti-FITC                      | polyclonal      | IF                     | Vector Laboratories                     | SP-0601     |
| rabbit anti-goat FITC               | polyclonal      | IF                     | Vector Laboratories                     | F1-5000     |
| goat anti-rat IgG Biotin            | polyclonal      | IF                     | Vector Laboratories                     | BA-9400     |
| chicken anti-GFP                    | polyclonal      | IF                     | Abcam                                   | ab13970     |
| goat anti-chicken Alexa Fluor488    | polyclonal      | IF                     | Invitrogen                              | A-11039     |
| chicken anti-goat Alexa Fluor488    | polyclonal      | IF                     | Invitrogen                              | A-21467     |
| chicken anti-rabbit Alexa Fluor488  | polyclonal      | IF                     | Invitrogen                              | A-21441     |
| chicken anti-mouse Alexa Fluor488   | polyclonal      | IF                     | Invitrogen                              | A-21200     |
| chicken anti-rabbit Alexa Fluor594  | polyclonal      | IF                     | Invitrogen                              | A-21442     |
| neutralite avidin-Texas Red         | n/a             | IF                     | Southern Biotechnology                  | 7200-07     |
| goat anti-mouse IgG-FITC            | polyclonal      | IF                     | Jackson Immunoresearch Laboratories     | 115-095-003 |
| goat anti-mouse IgG1-FITC           | polyclonal      | IF                     | Southern Biotechnology                  | 1070-02     |
| goat anti-mouse IgG2a-FITC          | polyclonal      | IF                     | Southern Biotechnology                  | 1080-02     |
| goat anti-mouse C3-FITC             | polyclonal      | IF                     | Southern Biotechnology                  | 1090-02     |
| rat anti-mouse occludin             | monoclonal<br>1 | IF                     | gift from Drs. T. Miyamoto & S. Tsukita | --          |
| anti-mouse MHCII                    | M5/114.7        | IF                     | hybridoma supernatant                   | --          |
| goat anti-human tACE                | polyclonal      | IF                     | Santa Cruz Biotechnology                | sc-12187    |
| HRP-conjugated goat anti-mouse IgG  | polyclonal      | ELISA                  | Southern Biotechnology                  | 1030-05     |
| rat anti-IFN- $\gamma$              | R4-6A2          | ELISA                  | BD Pharmingen                           | 551216      |
| biotinylated rat anti-IFN- $\gamma$ | XMG1.2          | ELISA                  | BD Pharmingen                           | 554410      |
| rabbit anti-Claudin-11              | polyclonal      | IB                     | Invitrogen                              | 36-4500     |
| rabbit anti-occludin                | polyclonal      | IB                     | Invitrogen                              | 71-1500     |
| rabbit anti-ZO-1                    | polyclonal      | IB                     | Invitrogen                              | 61-7300     |
| rabbit anti- $\alpha$ -catenin      | polyclonal      | IB                     | Santa Cruz Biotechnology                | sc-7894     |
| rabbit anti- $\beta$ -catenin       | polyclonal      | IB                     | Invitrogen                              | 71-2700     |
| goat anti-actin                     | polyclonal      | IB                     | Santa Cruz Biotechnology                | sc-1616     |
| CD4                                 | RM4-5           | FC                     | Ebioscience                             | 47-0042     |
| CD45                                | 30-F11          | FC                     | Ebioscience                             | 17-0451     |
| CD8                                 | 53-6.7          | FC                     | Ebioscience                             | 51-008      |
| CD11b                               | M1/70           | FC                     | Ebioscience                             | 47-0112     |
| DO11.10 TCR                         | KJ126           | FC                     | Ebioscience                             | 17-9451     |
| CD69                                | H1.2F3          | FC                     | BD Pharmingen                           | 553235      |
| iNos                                | CXNFT           | FC                     | Ebioscience                             | 17-5920     |

|                          |                    |    |                       |                   |
|--------------------------|--------------------|----|-----------------------|-------------------|
| MHCII                    | 25-9-17,<br>10-3.6 | FC | BD Pharmingen         | 553605,<br>553540 |
| IL-4R $\alpha$           | mIL4R-M1           | FC | BD Pharmingen         | 552509            |
| CD206                    | MR5D3              | FC | BD Pharmingen         | 565250            |
| Foxp3                    | FJK-16s            | FC | eBioscience           | 17-5773-82        |
| anti-Fc $\gamma$ RII/III | 2.4G2              | FC | hybridoma supernatant | --                |

\*IF=immunofluorescence, IP=immunoperoxidase, IB=immunoblot, FC=flow cytometry

Supplemental Table 2: Detailed Procedures for IF and IP studies.

| Figure         | Purpose (method)                                                      | Tissue section                                                   | Fixative            | 1 <sup>st</sup> Ab (dilution)                                                    | 2 <sup>nd</sup> Ab (dilution)             | Amplification                                | Neutralize Avidin-Texas Red (1:500) | 3 <sup>rd</sup> Ab (dilution)             | 4th Ab (dilution)                         | Amplification                | Neutralize Avidin-Texas Red (1:500) |
|----------------|-----------------------------------------------------------------------|------------------------------------------------------------------|---------------------|----------------------------------------------------------------------------------|-------------------------------------------|----------------------------------------------|-------------------------------------|-------------------------------------------|-------------------------------------------|------------------------------|-------------------------------------|
| 1B             | MGCA & Sertoli cells (IF)                                             | GFP-Sex testes                                                   | Bouin               | rabbit anti-LDH3 (1:400)                                                         | biotinylated goat anti-rabbit IgG (1:200) | -                                            | yes                                 | chicken anti-GFP (1:500)                  | goat anti-chicken alexafluor488 (1:500)   | -                            | -                                   |
| 1B inset       | Occludin & Sertoli cells (IF)                                         | GFP-Sex testes                                                   | Acetone/<br>Ethanol | rat anti-occludin (1:200)                                                        | biotinylated goat anti-rat IgG (1:500)    | TSA Biotin Amplification Kit                 | yes                                 | chicken anti-GFP (1:500)                  | donkey anti-chicken alexafluor488 (1:500) | -                            | -                                   |
| 2A-D; 3F       | Testis Immune Complexes (IF)                                          | WT mouse testes; <i>Ldh3</i> null testes; OVA-Hi & OVA-Lo testes | Acetone/<br>Ethanol | rabbit anti-LDH3 (1:400), rabbit anti-Zan D3p18 (1:200), rabbit anti-OVA (1:500) | FITC goat anti-rabbit IgG (1:200)         | TSA FITC Amplification Kit                   | -                                   | rat anti-occludin (1:200)                 | biotinylated goat anti-rat IgG (1:500)    | TSA Biotin Amplification Kit | yes                                 |
| 3B; 7A; 7E; 7G | OVA (IP)                                                              | OVA-Hi & OVA-Lo testes                                           | Bouin               | rabbit anti-OVA (1:500)                                                          | biotinylated goat anti-rabbit IgG (1:200) | ABC kit and osmication                       | -                                   | -                                         | -                                         | -                            | -                                   |
| 3E             | Injected FITC in Seminiferous Tubules (IF)                            | OVA-Hi testes                                                    | Acetone/<br>Ethanol | rat anti-occludin                                                                | biotinylated goat anti-rat IgG (1:500)    | TSA Biotin Amplification Kit                 | yes                                 | -                                         | -                                         | -                            | -                                   |
| 3G             | Testis Immune Complex & MHC class II (IF)                             | OVA-Hi testes (injected with rabbit anti-OVA)                    | Acetone/<br>Ethanol | rat anti-mouse MHCII (1:200)                                                     | FITC rabbit anti-rat (1:400)              | TSA FITC Amplification Kit                   | -                                   | biotinylated goat anti-rabbit IgG (1:200) | -                                         | -                            | yes                                 |
| 6B             | Zan & F4/80 (IF)                                                      | Control & DERE G testes                                          | Acetone/<br>Ethanol | biotinylated rat anti-mouse F4/80 (1:300)                                        | -                                         | TSA Biotin Amplification Kit                 | yes                                 | rabbit anti-Zan D3p18 (1:200)             | FITC goat anti-rabbit IgG (1:200)         | -                            | -                                   |
| 6D             | Endogenous Immune Complexes & Occludin (IF)                           | DERE G testes                                                    | Acetone/<br>Ethanol | rat anti-occludin (1:200)                                                        | biotinylated goat anti-rat IgG (1:500)    | TSA Biotin Amplification Kit                 | yes                                 | FITC goat anti-mouse IgG (1:100)          | -                                         | -                            | -                                   |
| 6E             | Detect Biotin in Seminiferous Tubules (IF)                            | Control & DERE G testes                                          | Acetone/<br>Ethanol | -                                                                                | -                                         | -                                            | yes                                 | -                                         | -                                         | -                            | -                                   |
| 6G             | Rabbit LDH3 Immune Complexes & Endogenous mouse immune Complexes (IF) | DERE G testes                                                    | Acetone/<br>Ethanol | FITC goat anti-mouse IgG (1:100)                                                 | biotinylated goat anti-rabbit IgG (1:200) | -                                            | yes                                 | -                                         | -                                         | -                            | -                                   |
| 7C             | OVA & tACE (IF)                                                       | OVA-Hi testes                                                    | Bouin               | mouse anti-OVA (1:200)                                                           | chicken anti-mouse alexafluor488 (1:500)  | -                                            | -                                   | goat anti-tACE (1:100)                    | biotinylated rabbit anti-goat (1:200)     | -                            | yes                                 |
| 7D; 7F         | OVA & GFP (IF)                                                        | GFP-Sex x OVA-Hi testes                                          | Bouin               | rabbit anti-OVA (1:500)                                                          | biotinylated goat anti-rabbit IgG (1:200) | -                                            | yes                                 | chicken anti-GFP (1:500)                  | donkey anti-chicken alexafluor488 (1:500) | -                            | -                                   |
| 8A left        | LDH3 (IP)                                                             | BALB/c testes                                                    | Bouin               | rabbit anti-LDH3 (1:200)                                                         | biotinylated goat anti-rabbit IgG (1:200) | ABC kit and osmication                       | -                                   | -                                         | -                                         | -                            | -                                   |
| 8A right       | Zan (IP)                                                              | BALB/c testes                                                    | Formalin            | rabbit anti-Zan D3p18 (1:400)                                                    | -                                         | Envision dual link and 3,3'-diaminobenzidine | -                                   | -                                         | -                                         | -                            | -                                   |

|    |                     |                      |       |                                        |                                                     | tetrahydrochlori<br>de chromagen<br>(Dako) |   |                                        |                                                     |   |     |
|----|---------------------|----------------------|-------|----------------------------------------|-----------------------------------------------------|--------------------------------------------|---|----------------------------------------|-----------------------------------------------------|---|-----|
| 8B | OVA &<br>LDH3 (IF)  | OVA-<br>Hi<br>testes | Bouin | mouse<br>anti-OVA                      | FITC goat<br>anti-mouse<br>IgG (1:100)              | -                                          | - | rabbit<br>anti-<br>LDH3<br>(1:200)     | biotinylated<br>goat anti-<br>rabbit IgG<br>(1:400) | - | yes |
| 8C | OVA &<br>Zan (IF)   | OVA-<br>Hi<br>testes | Bouin | mouse<br>anti-OVA                      | FITC goat<br>anti-mouse<br>IgG (1:100)              | -                                          | - | rabbit<br>anti-Zan<br>D3p18<br>(1:200) | biotinylated<br>goat anti-<br>rabbit IgG<br>(1:400) | - | yes |
| 8D | LDH3 &<br>tACE (IF) | BALB/<br>c testes    | Bouin | rabbit<br>anti-<br>LDH3<br>(1:200)     | chicken<br>anti-rabbit<br>alexafluor5<br>94 (1:500) | -                                          | - | goat anti-<br>tACE<br>(1:100)          | chicken<br>anti-goat<br>alexafluor4<br>88 (1:500)   | - | -   |
| 8E | Zan &<br>tACE (IF)  | BALB/<br>c testes    | Bouin | rabbit<br>anti-Zan<br>D3p18<br>(1:200) | chicken<br>anti-rabbit<br>alexafluor5<br>94 (1:500) | -                                          | - | goat anti-<br>tACE<br>(1:100)          | chicken<br>anti-goat<br>alexafluor4<br>88 (1:500)   | - | -   |
